# Supplementary material for: Mortality in East African shorthorn zebu cattle under one year: predictors of infectious-disease mortality
Source: Springer Nature journal article supplement (doi:10.1186/1746-6148-9-175), 2013-01-01

● IDEAL lab - Busia

■ Study sub-locations

□ Sub-locations within 45km buffer

### Agro-ecological zones

■ LM1

■ LM2

■ LM3

■ UM3

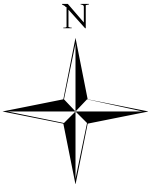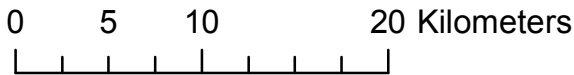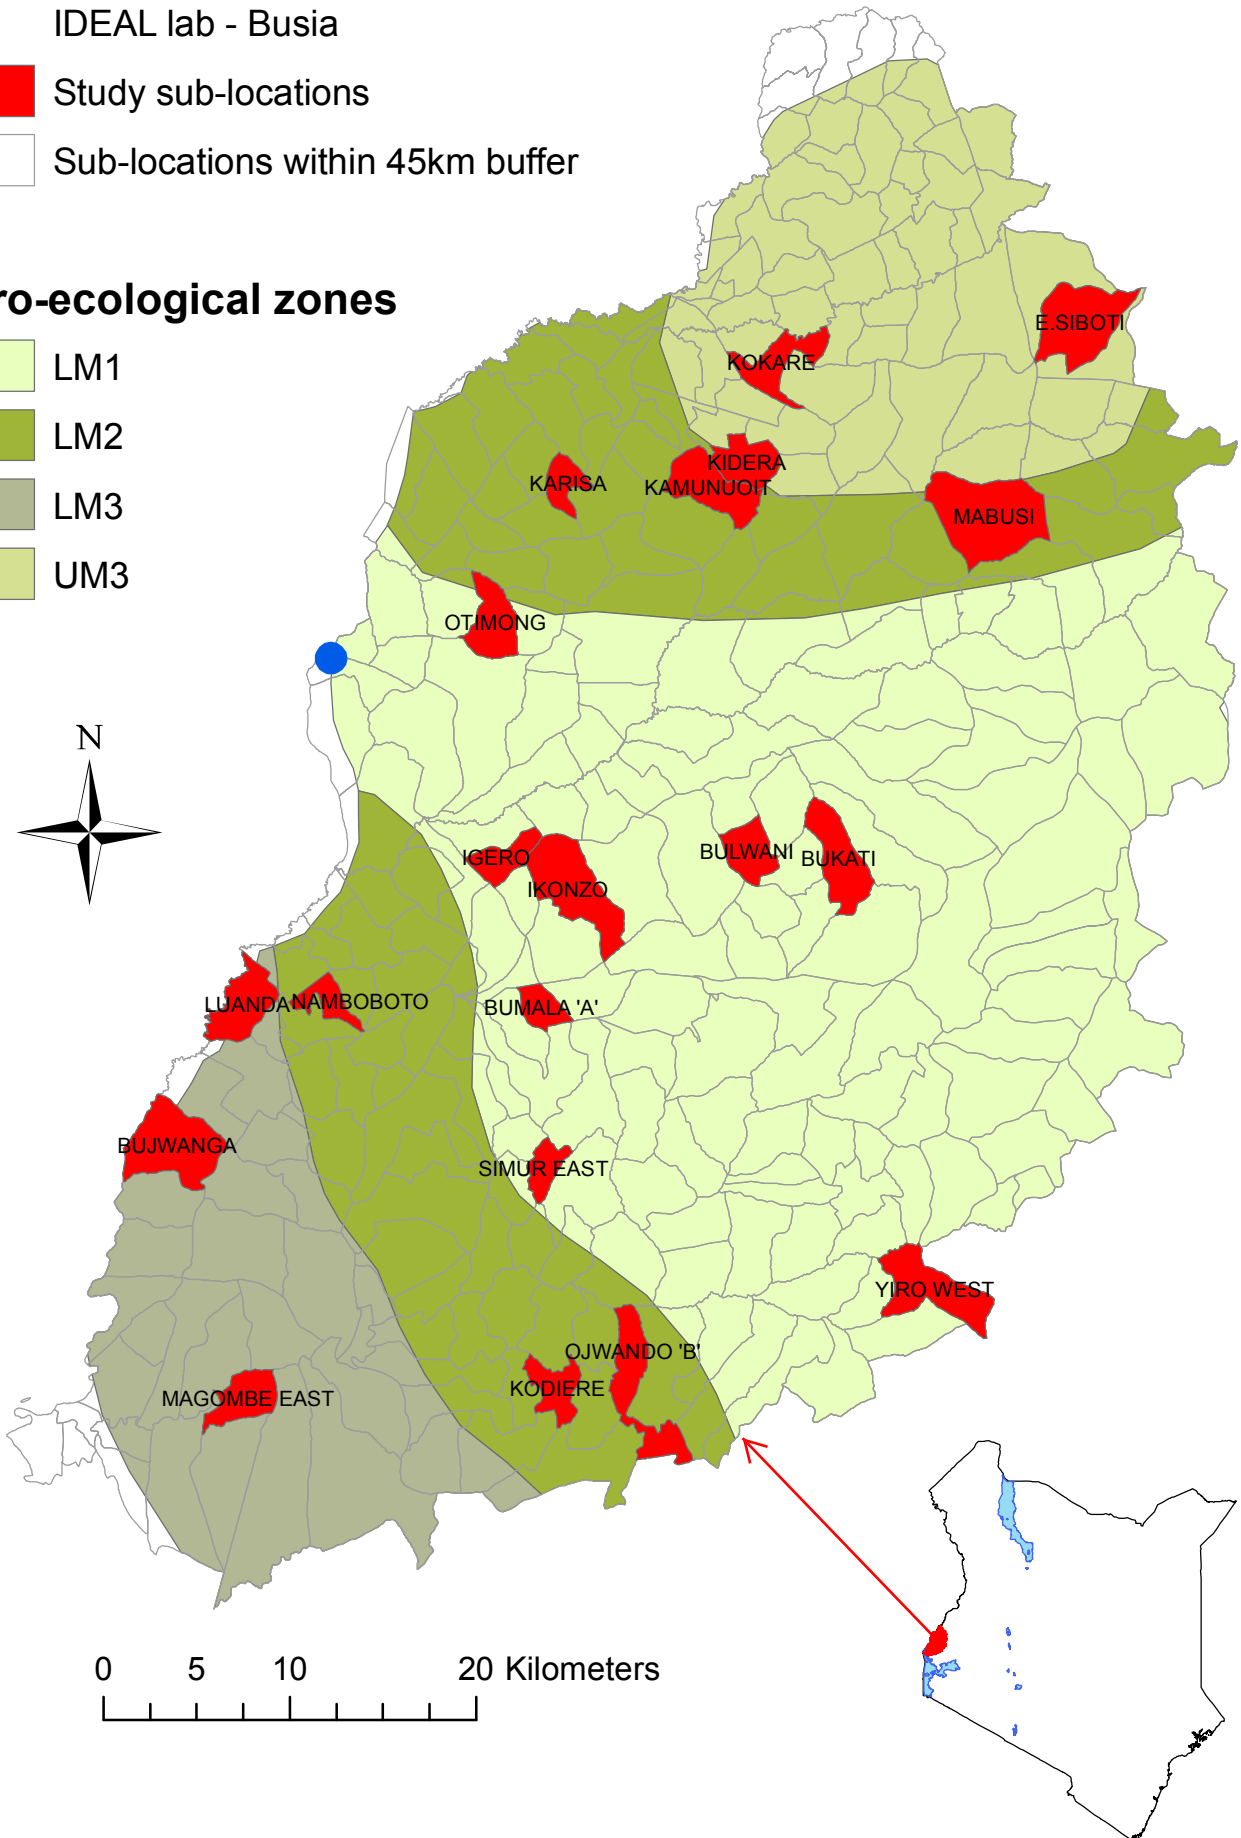

Supplement: 12917_2013_751_MOESM3_ESM.pdf [file 12917_2013_751_MOESM3_ESM.pdf]
