# Supplementary figures and images for: Mortality in East African shorthorn zebu cattle under one year: predictors of infectious-disease mortality
Source: Springer Nature journal article supplement (doi:10.1186/1746-6148-9-175), 2013-01-01

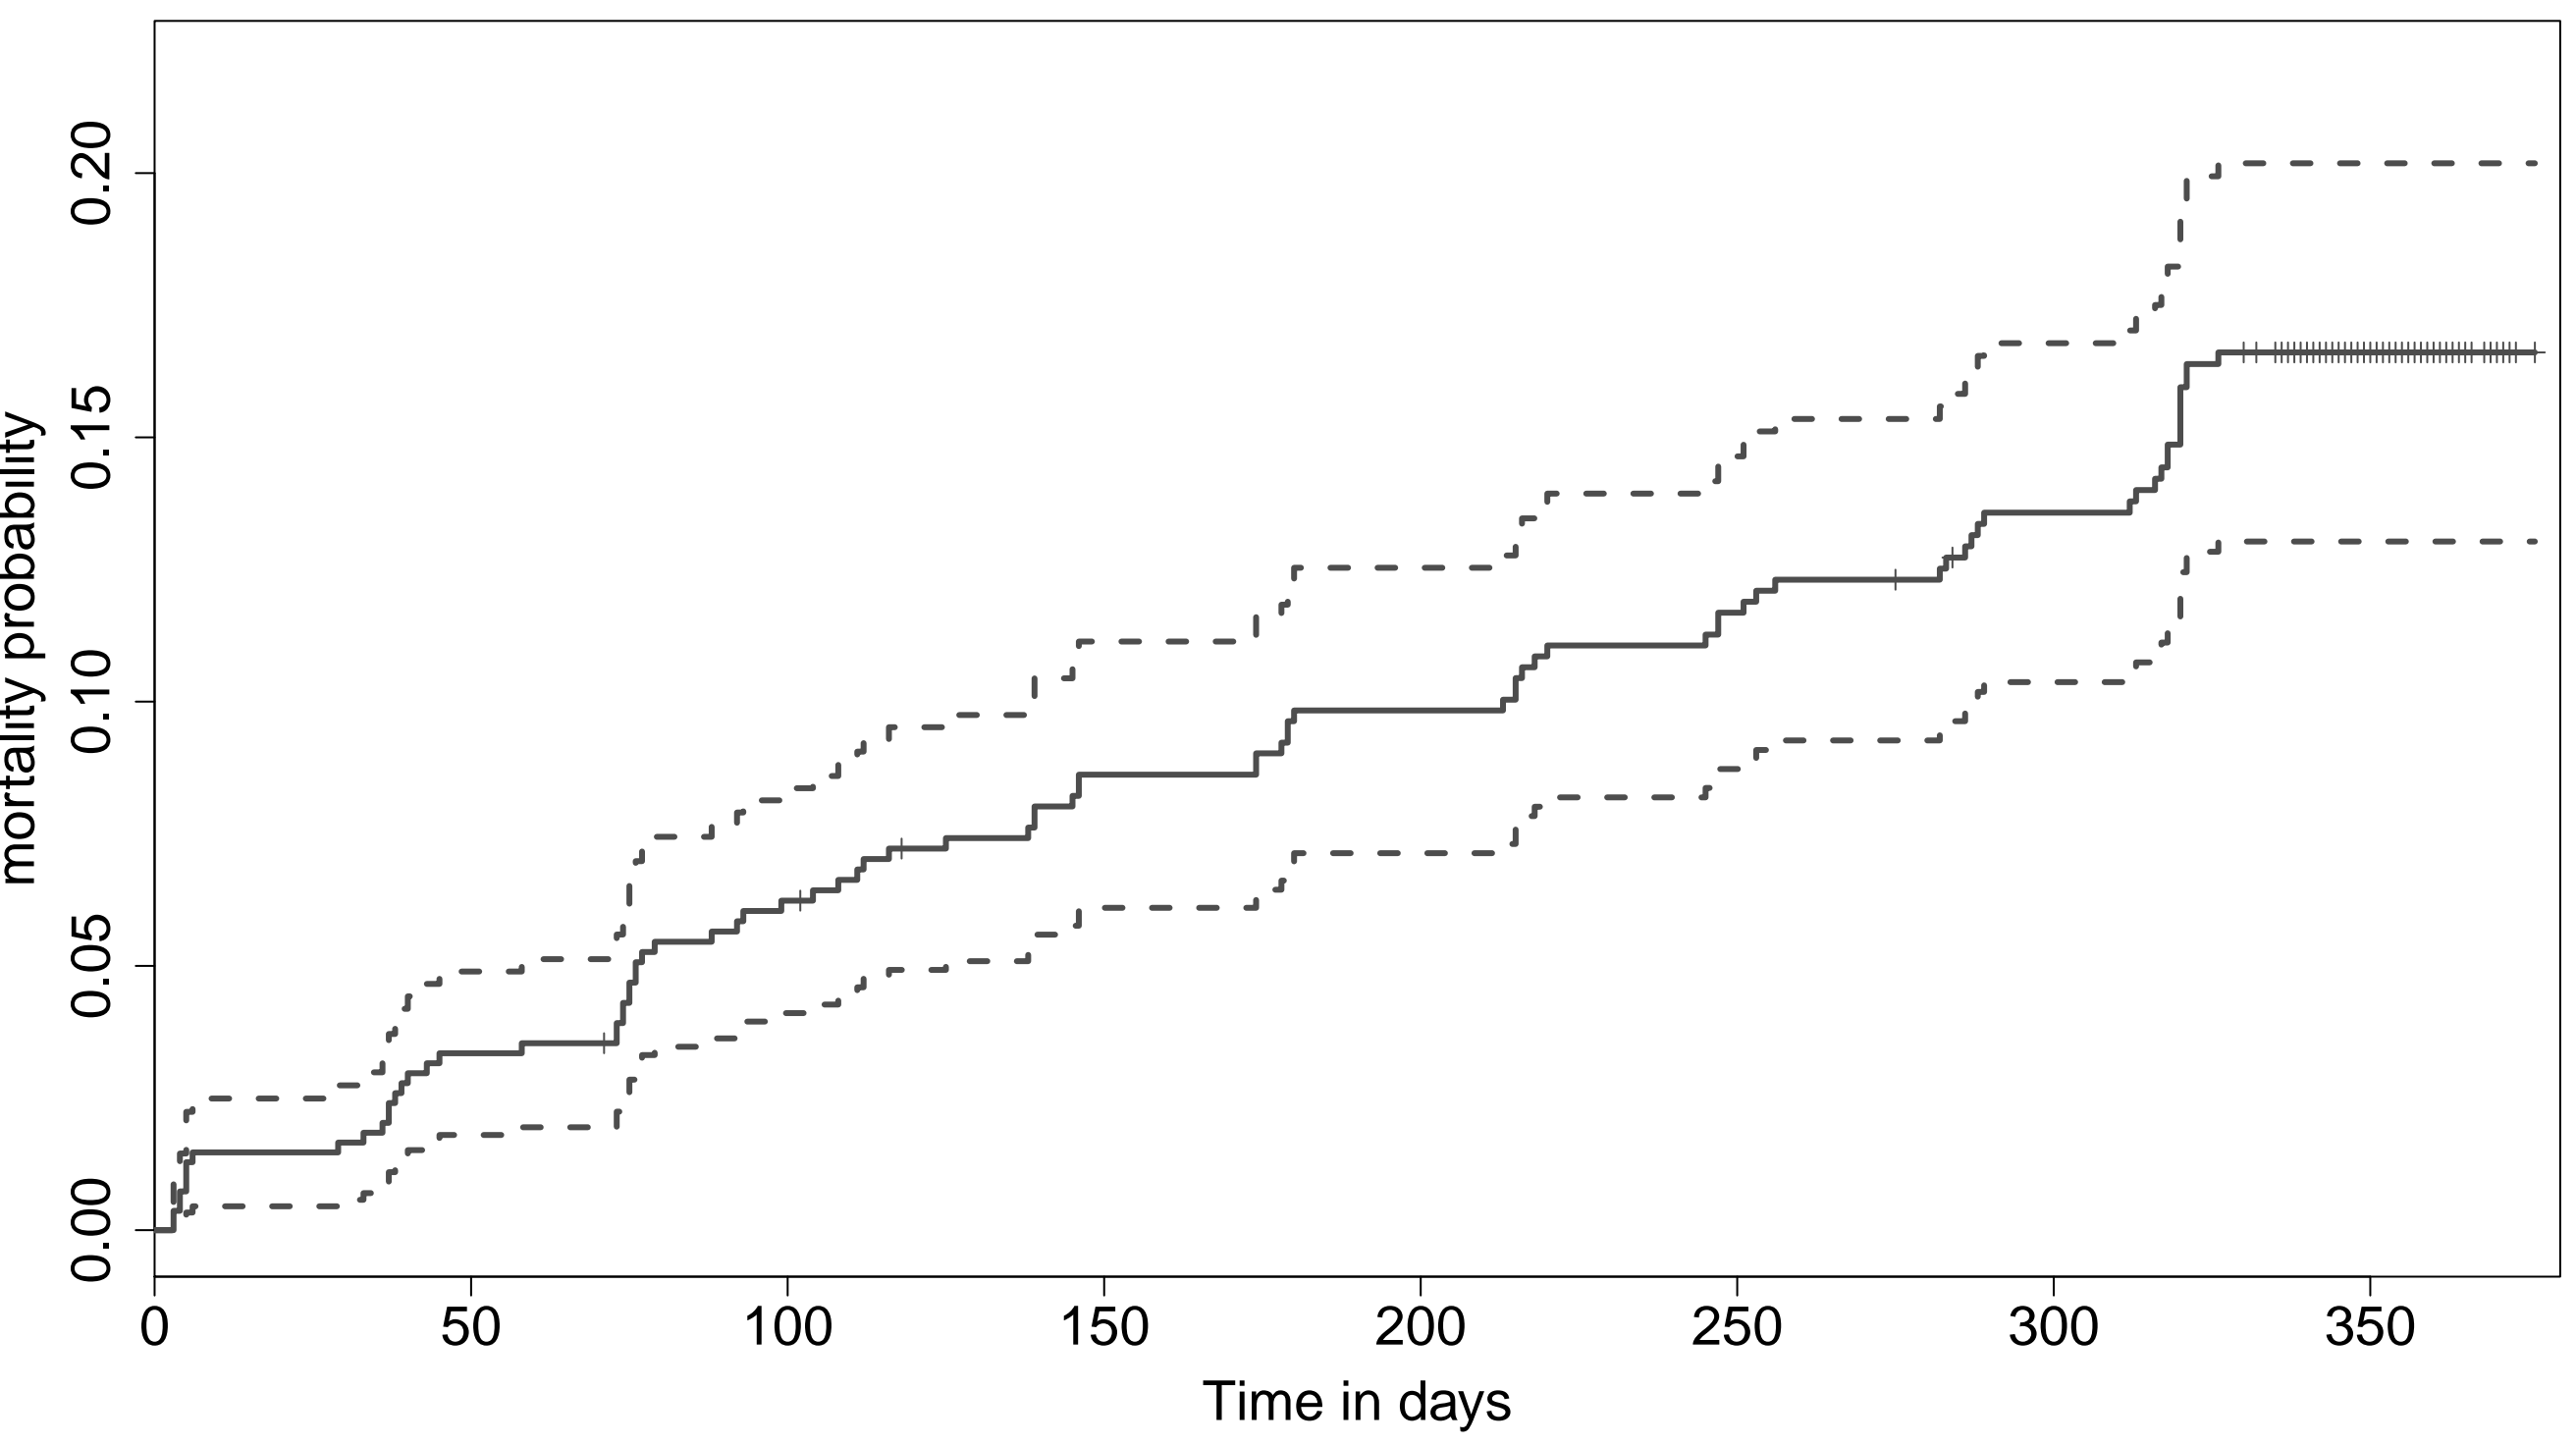

Supplement: 12917_2013_751_MOESM4_ESM.pdf [file 12917_2013_751_MOESM4_ESM.pdf]

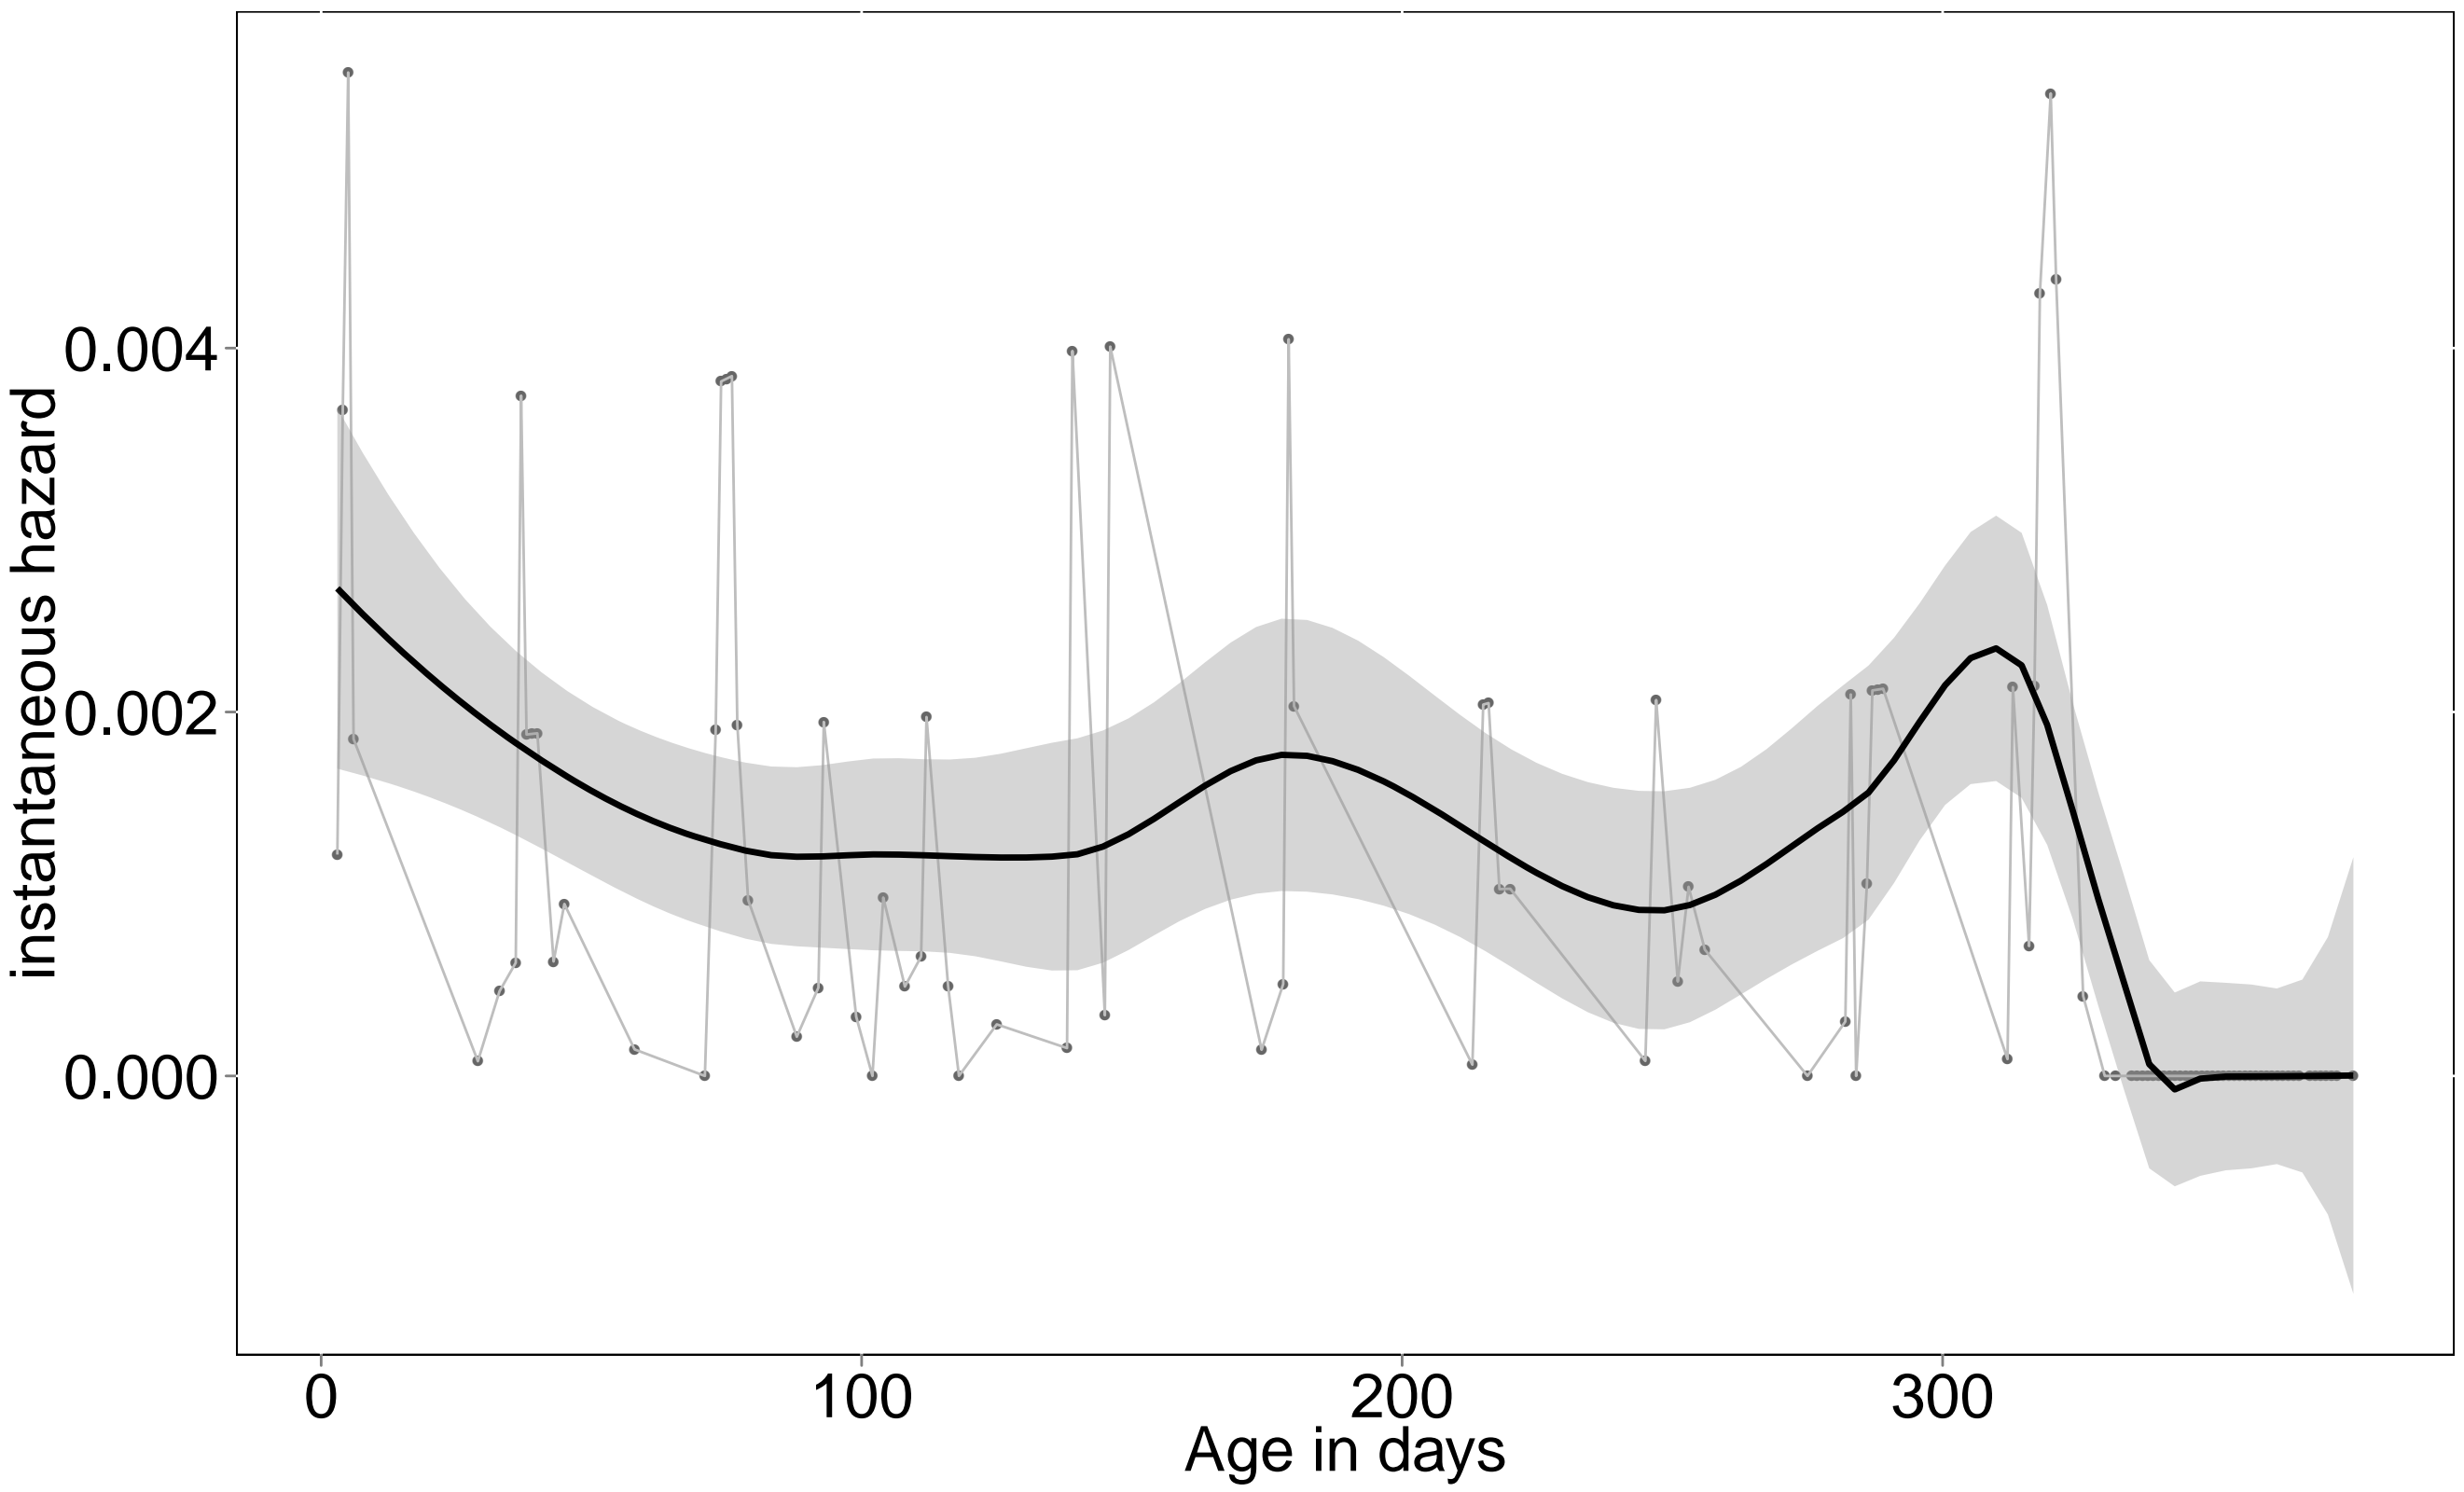

Supplement: 12917_2013_751_MOESM5_ESM.pdf [file 12917_2013_751_MOESM5_ESM.pdf]

# Infectious disease mortality

HAZARD (%)

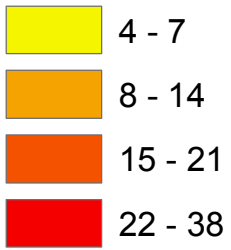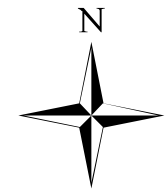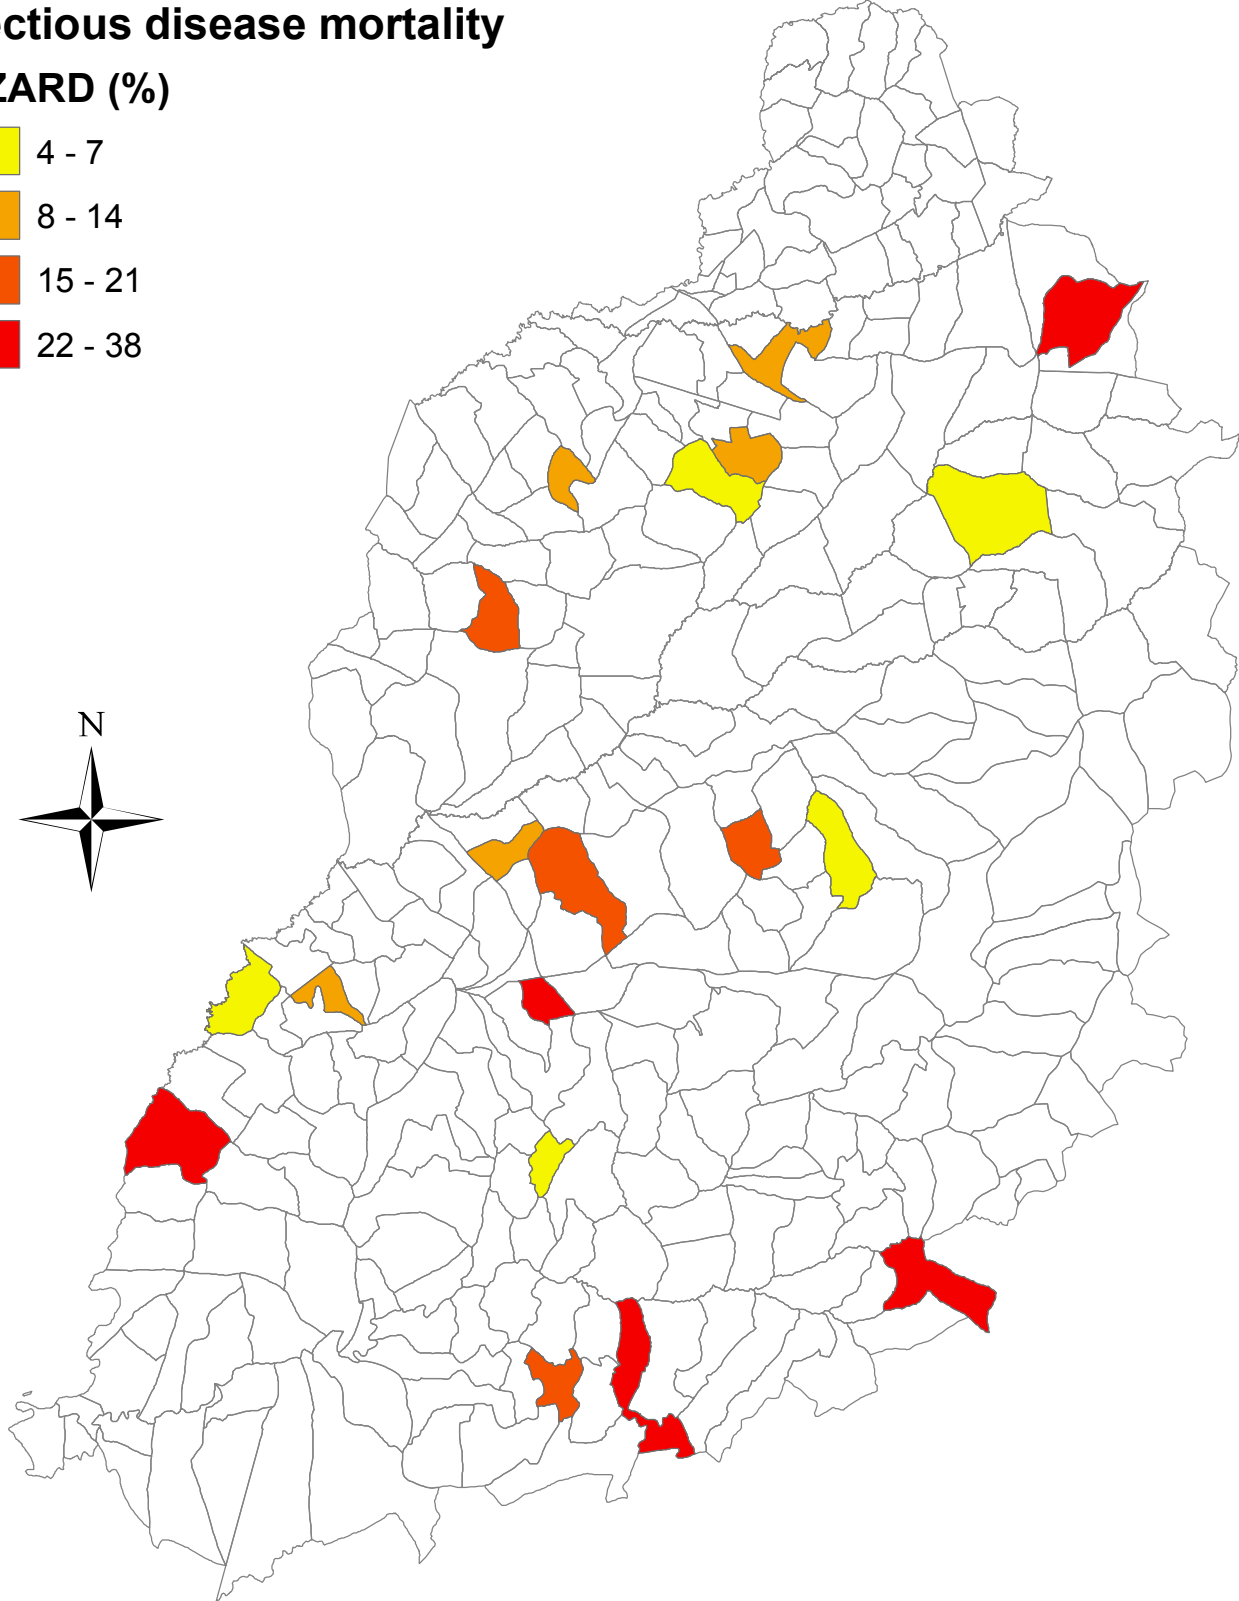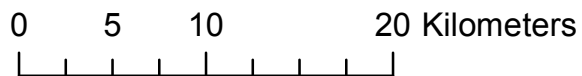

Supplement: 12917_2013_751_MOESM6_ESM.pdf [file 12917_2013_751_MOESM6_ESM.pdf]

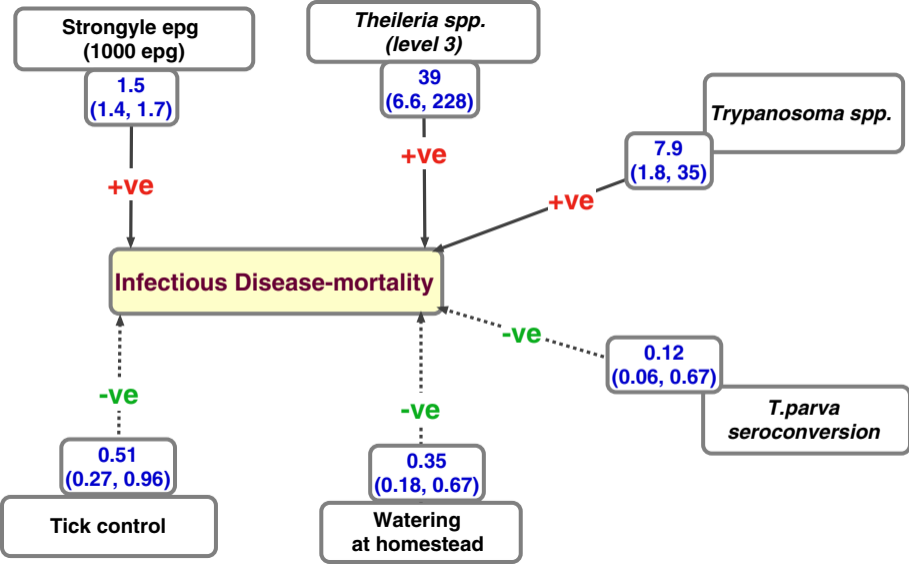

Supplement: 12917_2013_751_MOESM7_ESM.pdf [file 12917_2013_751_MOESM7_ESM.pdf]

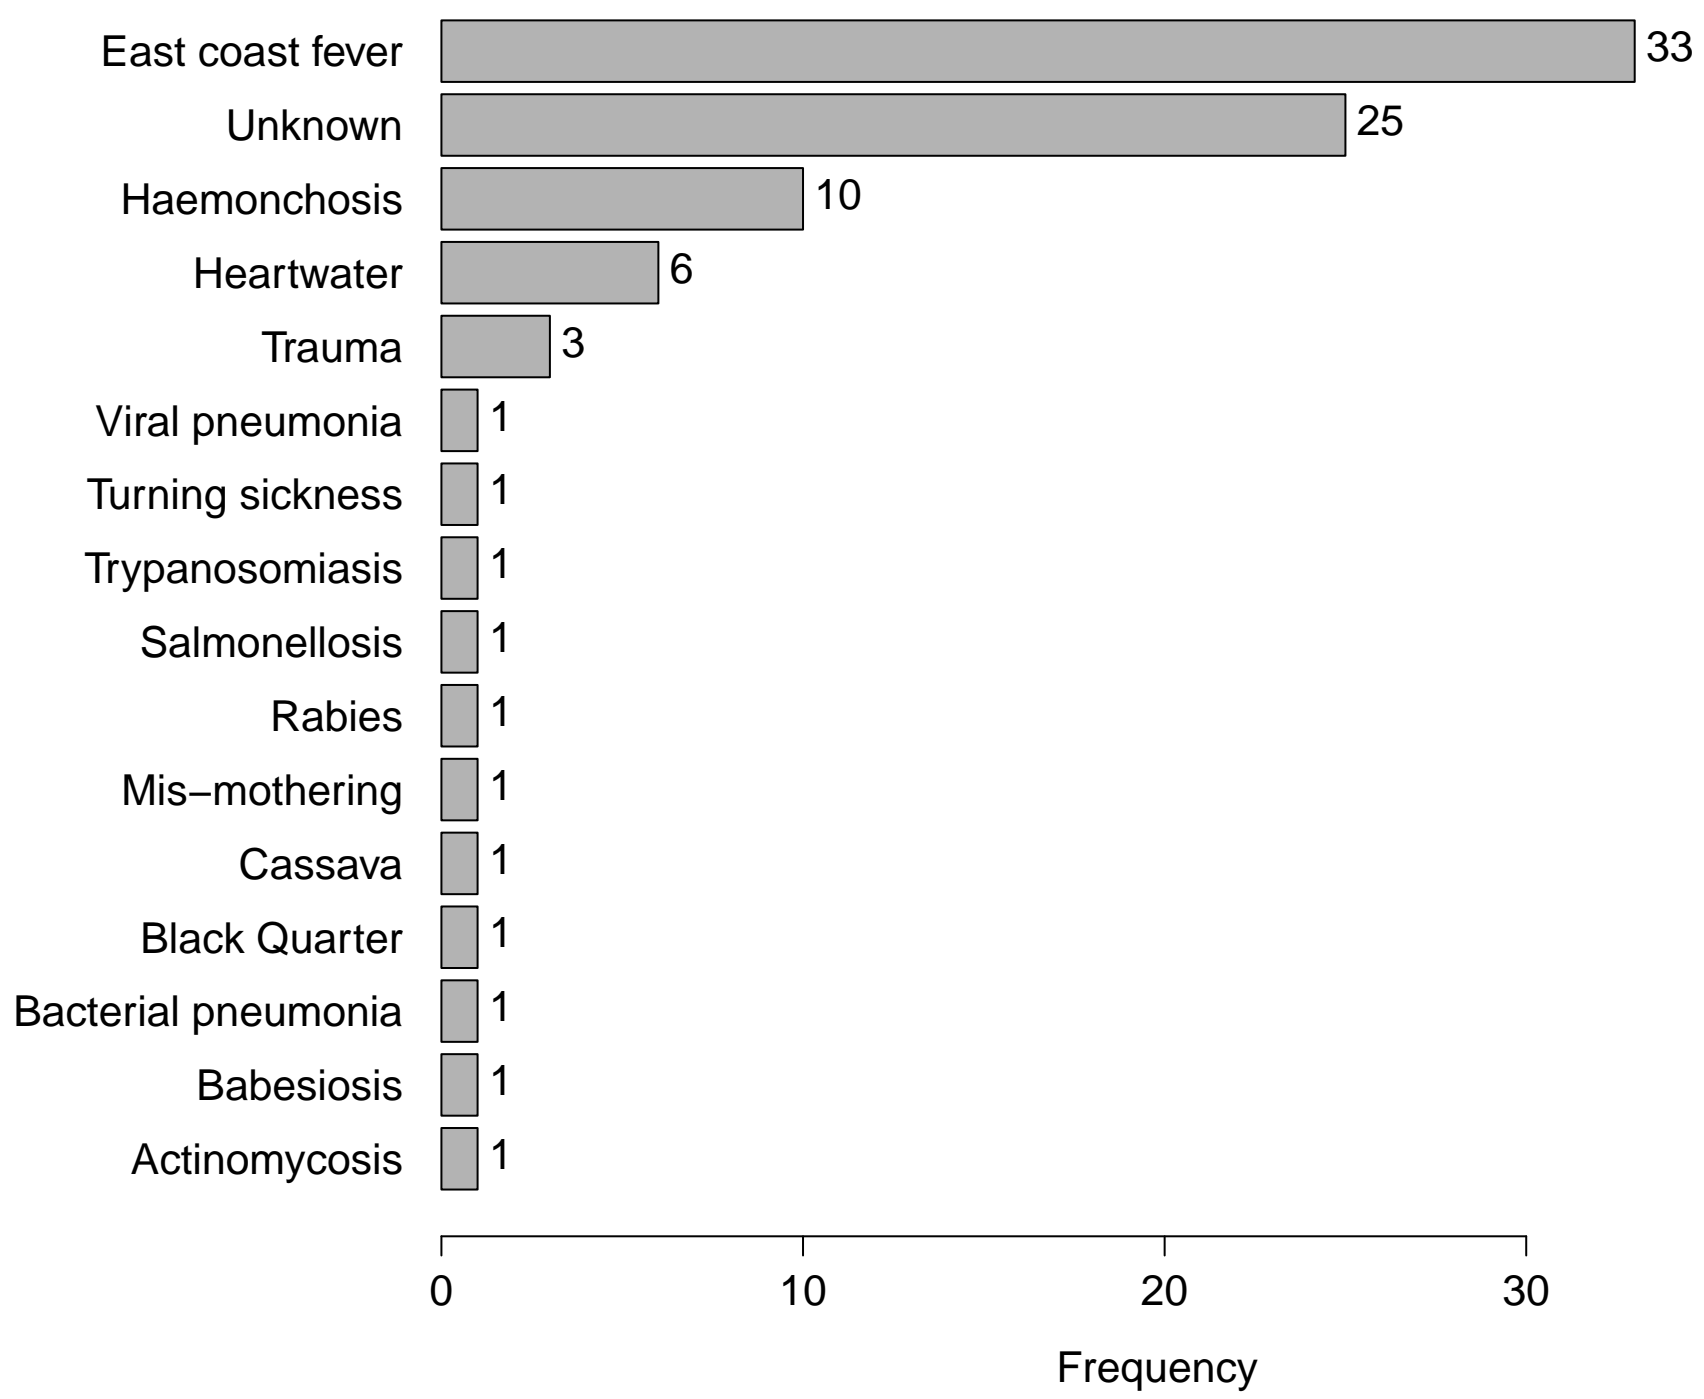

Supplement: 12917_2013_751_MOESM8_ESM.pdf [file 12917_2013_751_MOESM8_ESM.pdf]
